# Supplementary material
Source: Research Square preprint supplement (doi:10.21203/rs.3.rs-8587407/v1)
Supplement: Supplementary file 1 [file 1ef31807bba5673fc499bfde.docx]

Supplementary Material 5. Occupations of participants (detail)

| Occupation | Overall (n=9,235) | Dysmenorrhea (n=956) |
| --- | --- | --- |
| Clerical occupations*1 | 4,264 (46.2%) | 414 (43.3%) |
| Sales/Marketing occupations | 1,459 (15.8%) | 160 (16.7%) |
| Professional/Technical occupations*2 | 1,207 (13.1%) | 164 (17.2%) |
| Unemployed | 677 (7.3%) | 53 (5.5%) |
| Service occupations | 355 (3.8%) | 42 (4.4%) |
| Manual labor occupations | 204 (2.2%) | 25 (2.6%) |
| Managerial positions*3 | 162 (1.8%) | 7 (0.7%) |
| Student | 29 (0.3%) | 6 (0.6%) |
| Others | 878 (9.5%) | 85 (8.9%) |

*1: Includes accounting clerks, sales clerks, receptionists, secretaries, and researchers.

*2: Includes physicians, nurses, lawyers, engineers, designers, management consultants, interpreters, and editors.

*3: Includes managerial positions at the section chief level or higher, and executives/officers of companies or organizations.
