# Supplementary material
Source: Research Square preprint supplement (doi:10.21203/rs.3.rs-8587407/v1)
Supplement: Supplementary file 2 [file 2888f8e064791fd45813707e.xlsx]

## Sheet: Supplementary Material2
treatment group	who_atc_code	who_atc_name	Name	Notes
LEP	G03FA01	Norethisterone and estrogen	Lunabell
LEP	G03FA01	Norethisterone and estrogen	Frewell
LEP	G03FA01	Norethisterone and estrogen	Lunabell
LEP	G03FA01	Norethisterone and estrogen	Frewell
LEP	G03FA10	Norgestrel and estrogen	Planovar	medium/high dose
LEP	G03FA11	Levonorgestrel and estrogen	Jemina
LEP	G03FA17	Drospirenone and estrogen	Yaz
LEP	G03FA17	Drospirenone and estrogen	DroEthi
LEP	G03FA17	Drospirenone and estrogen	YazFlex
Progestin	G03DB01	Dydrogesterone	Duphaston
Progestin	G03DB06	Chlormadinone	Lutoral
Progestin	G03DB08	Dienogest	Dienogest
Progestin	G03DB08	Dienogest	Dinagest
Progestin	G03DC02	Norethisterone	Norluten
GnRH	H01CA02	Nafarelin	Nafarelin [F]
GnRH	H01CA02	Nafarelin	Nafarelil
GnRH	H01CA02	Nafarelin	Nasanyl
GnRH	L02AE01	Buserelin	Buserelin [F]
GnRH	L02AE01	Buserelin	Suprecur
GnRH	L02AE02	Leuprorelin	Leuplin
GnRH	L02AE02	Leuprorelin	Leuprorelin Acetate
GnRH	L02AE03	Goserelin	Zoladex
GnRH（antagonist）	L02BX04	Relugolix	Relumina
Analgesic agents	M01AB01	Indometacin
Analgesic agents	M01AB02	Sulindac
Analgesic agents	M01AB05	Diclofenac
Analgesic agents	M01AB08	Etodolac
Analgesic agents	M01AB11	Acemetacin
Analgesic agents	M01AB14	Proglumetacin
Analgesic agents	M01AC	Oxicam
Analgesic agents	M01AC01	Piroxicam
Analgesic agents	M01AC05	Lornoxicam
Analgesic agents	M01AC06	Meloxicam
Analgesic agents	M01AE	Propionic acid derivatives
Analgesic agents	M01AE01	Ibuprofen
Analgesic agents	M01AE02	Naproxen
Analgesic agents	M01AE03	Ketoprofen
Analgesic agents	M01AE09	Flurbiprofen
Analgesic agents	M01AE11	Tiaprofenic acid
Analgesic agents	M01AE12	Oxaprozin
Analgesic agents	M01AG01	Mefenamic acid
Analgesic agents	M01AG03	Flufenamic acid
Analgesic agents	M01AH01	Celecoxib
Analgesic agents	M01AX	Other antiinflammatory and antirheumatic agents
Analgesic agents	N02BA01	Acetylsalicylic acid
Analgesic agents	N02BE01	Paracetamol
Hemostatic agents	B02AA02	Tranexamic acid
Hemostatic agents	B02BX02	Carbazochrome
Kampo Medicine	V03AX	Other therapeutic products	Unkeito Extract
Kampo Medicine	V03AX	Other therapeutic products	Unseiin Extract
Kampo Medicine	V03AX	Other therapeutic products	Kamishoyosan Extract
Kampo Medicine	V03AX	Other therapeutic products	Kyukichoketsuin Extract
Kampo Medicine	V03AX	Other therapeutic products	Keishibukuryogan Extract
Kampo Medicine	V03AX	Other therapeutic products	Goshakusan Extract
Kampo Medicine	V03AX	Other therapeutic products	Daiobotampito Extract
Kampo Medicine	V03AX	Other therapeutic products	Tokakujokito Extract
Kampo Medicine	V03AX	Other therapeutic products	Tokikenchuto Extract
Kampo Medicine	V03AX	Other therapeutic products	Tokishakuyakusan Extract
Kampo Medicine	V03AX	Other therapeutic products	Tokishakuyakusankabushi Extract
LNG-IUS	G02BA03	Plastic IUD with progestogen	Mirena	IUD
Surgery	150215410	uterine prolapse surgery (colporrhaphy and total hysterectomy) (vaginal/abdominal)
Surgery	150216910	enucleatic myomectomy (abdominal)
Surgery	150216910	uterine (enucleatic) myomectomy (abdominal)
Surgery	150217410	supracervical hysterectomy
Surgery	150217510	total hysterectomy
Surgery	150222810	uterine rupture surgery (total hysterectomy)
Surgery	150223110	Porro hysterectomy
Surgery	150272250	total laparoscopic vaginal hysterectomy
Surgery	150278510	uterine (enucleatic) myomectomy (vaginal)
Surgery	150278610	hysteroscopic uterine myomectomy
Surgery	150294110	laparoscopic enucleatic myomectomy
Surgery	150294110	laparoscopic uterine (enucleatic) myomectomy
Surgery	150365910	hysteroscopic endometrial ablation
Surgery	150366010	laparoscopic supracervical hysterectomy
Surgery	150409210	total laparoscopic vaginal hysterectomy (using supporting device for endoscopic surgery)
Surgery	150421710	hysteroscopic uterine myomectomy (using electrolyte solution)
Surgery	150421810	hysteroscopic uterine myomectomy (other)
Surgery	190182010	short stay for surgery basic fee [3-ae] K873, hysteroscopic uterine myomectomy
Surgery	190182010	short stay for surgery basic fee [3-w] K873, hysteroscopic uterine myomectomy
Surgery	190182010	short stay for surgery basic fee [3-z] K873, hysteroscopic uterine myomectomy
Surgery	190272610	short stay for surgery basic fee [3] K873, hysteroscopic uterine myomectomy [1], using electrolyte solution
Surgery	190272810	short stay for surgery basic fee [3] K873, hysteroscopic uterine myomectomy [2], other
