# Supplementary material
Source: Research Square preprint supplement (doi:10.21203/rs.3.rs-8587407/v1)
Supplement: Supplementary file 4 [file 537856b9d2bed8f52cba4730.docx]

Supplementary Material 1. WPAI questionnaire items and score calculation methods

Questions

Q1: During the past 7 days, how many hours did you miss work because of health problems?

Q2: During the past 7 days, how many hours did you miss work for reasons other than health problems (e.g., holidays, vacation, or time off to participate in this survey)?

Q3: During the past 7 days, how many hours did you actually work?

Q4: During the past 7 days, while you were working, how much did health problems affect your productivity? (scale, 0–10)

Q5: During the past 7 days, how much did health problems affect your ability to carry out regular daily activities other than work? (scale, 0–10)

Score calculations

1. Absenteeism: Q2 / (Q2 + Q4) × 100 (exclude if Q2 and Q4 are both 0)
2. Presenteeism: Q5 / 10 × 100 (exclude if the respondent answered Q5 but indicated “no work”)
3. Overall Work Productivity Loss: Q2 / (Q2 + Q4) + [(1 - (Q2 / (Q2 + Q4))) × (Q5 / 10)] × 100 (exclude if Q2 and Q4 are both 0 and the calculation is not possible)
4. Activity Impairment: Q6 / 10 × 100

*If Q1 + Q2 + Q3 = 0 or Q1 + Q2 + Q3 > 168 (exceeding the total number of hours in a week), the responses for Q1, Q2, and Q3 were deemed inconsistent and invalidated.
