# Supplementary material
Source: Research Square preprint supplement (doi:10.21203/rs.3.rs-8587407/v1)
Supplement: Supplementary file 5 [file 829223dd148c47f299d75607.xlsx]

## Sheet: Supplementary Material3
Name of disease or injury	ICD10 Code	ICD10_Disease name
Malignant tumor	C40	Malignant neoplasm of bone and articular cartilage of limbs
	C49	Malignant neoplasm of other connective and soft tissue
	C75	Malignant neoplasm of other endocrine glands and related structures
	C79	Secondary malignant neoplasm of other and unspecified sites
	C06	Malignant neoplasm of other and unspecified parts of mouth
	C41	Malignant neoplasm of bone and articular cartilage of other and unspecified sites
	C57	Malignant neoplasm of other and unspecified female genital organs
	C08	Malignant neoplasm of other and unspecified major salivary glands
	C24	Malignant neoplasm of other and unspecified parts of biliary tract
	C68	Malignant neoplasm of other and unspecified urinary organs
	C76	Malignant neoplasm of other and ill-defined sites
	C14	Malignant neoplasm of other and ill-defined sites in the lip, oral cavity and pharynx
	C81	Hodgkin lymphoma
	C91	Lymphoid leukaemia
	C77	Secondary and unspecified malignant neoplasm of lymph nodes
	C82	Follicular lymphoma
	C80	Malignant neoplasm, without specification of site
	C88	Malignant immunoproliferative diseases
	C16	Malignant neoplasm of stomach
	C13	Malignant neoplasm of hypopharynx
	C51	Malignant neoplasm of vulva
	C22	Malignant neoplasm of liver and intrahepatic bile ducts
	C69	Malignant neoplasm of eye and adnexa
	C34	Malignant neoplasm of bronchus and lung
	C37	Malignant neoplasm of thymus
	C18	Malignant neoplasm of colon
	C78	Secondary malignant neoplasm of respiratory and digestive organs
	C48	Malignant neoplasm of retroperitoneum and peritoneum
	C00	Malignant neoplasm of lip
	C32	Malignant neoplasm of larynx
	C73	Malignant neoplasm of thyroid gland
	C92	Myeloid leukaemia
	C95	Leukaemia of unspecified cell type
	C55	Malignant neoplasm of uterus, part unspecified
	C53	Malignant neoplasm of cervix uteri
	C54	Malignant neoplasm of corpus uteri
	C17	Malignant neoplasm of small intestine
	C15	Malignant neoplasm of oesophagus
	C38	Malignant neoplasm of heart, mediastinum and pleura
	C65	Malignant neoplasm of renal pelvis
	C64	Malignant neoplasm of kidney, except renal pelvis
	C70	Malignant neoplasm of meninges
	C84	Mature T/NK-cell lymphomas
	C72	Malignant neoplasm of spinal cord, cranial nerves and other parts of central nervous system
	C02	Malignant neoplasm of other and unspecified parts of tongue
	C61	Malignant neoplasm of prostate
	C90	Multiple myeloma and malignant plasma cell neoplasms
	C58	Malignant neoplasm of placenta
	C93	Monocytic leukaemia
	C23	Malignant neoplasm of gallbladder
	C10	Malignant neoplasm of oropharynx
	C45	Mesothelioma
	C19	Malignant neoplasm of rectosigmoid junction
	C20	Malignant neoplasm of rectum
	C50	Malignant neoplasm of breast
	C66	Malignant neoplasm of ureter
	C71	Malignant neoplasm of brain
	C44	Other malignant neoplasms of skin
	C43	Malignant melanoma of skin
	C85	Other and unspecified types of non-Hodgkin lymphoma
	C83	Non-follicular lymphoma
	C11	Malignant neoplasm of nasopharynx
	C30	Malignant neoplasm of nasal cavity and middle ear
	C74	Malignant neoplasm of adrenal gland
	C31	Malignant neoplasm of accessory sinuses
	C47	Malignant neoplasm of peripheral nerves and autonomic nervous system
	C56	Malignant neoplasm of ovary
	C09	Malignant neoplasm of tonsil
	C21	Malignant neoplasm of anus and anal canal
	C67	Malignant neoplasm of bladder
	C52	Malignant neoplasm of vagina
	C25	Malignant neoplasm of pancreas
Diabetes mellitus	E10	Type 1 diabetes mellitus
	E11	Type 2 diabetes mellitus
	E13	Other specified diabetes mellitus
Thyroid disease	E03	Other hypothyroidism
	E07	Other disorders of thyroid
	E04	Other nontoxic goitre
	C73	Malignant neoplasm of thyroid gland
	D34	Benign neoplasm of thyroid gland
	E06	Thyroiditis
	E05	Thyrotoxicosis [hyperthyroidism]
Cardiovascular disease	I11	Hypertensive heart disease
	I12	Hypertensive renal disease
	I15	Secondary hypertension
	O13	Gestational [pregnancy-induced] hypertension
	I10	Essential (primary) hypertension
	I24	Other acute ischaemic heart diseases
	I82	Other venous embolism and thrombosis
	I21	Acute myocardial infarction
	I20	Angina pectoris
	I50	Heart failure
	I48	Atrial fibrillation and flutter
	I802	Phlebitis and thrombophlebitis of other deep vessels of lower extremities
	I71	Aortic aneurysm and dissection
	I74	Arterial embolism and thrombosis
	I63	Cerebral infarction
	I61	Intracerebral haemorrhage
	I26	Pulmonary embolism
	I44	Atrioventricular and left bundle-branch block
	I25	Chronic ischaemic heart disease
Mental disorders (including depression and schizophrenia)	F10	Mental and behavioural disorders due to use of alcohol
	F00	Dementia in Alzheimer disease
	F32	Depressive episode
	F48	Other neurotic disorders
	F28	Other nonorganic psychotic disorders
	F41	Other anxiety disorders
	F17	Mental and behavioural disorders due to use of tobacco
	F44	Dissociative [conversion] disorders
	F23	Acute and transient psychotic disorders
	F42	Obsessive-compulsive disorder
	F40	Phobic anxiety disorders
	F84	Pervasive developmental disorders
	F34	Persistent mood [affective] disorders
	F22	Persistent delusional disorders
	F43	Reaction to severe stress, and adjustment disorders
	F39	Unspecified mood [affective] disorder
	F45	Somatoform disorders
	F50	Eating disorders
	F31	Bipolar affective disorder
	F19	Mental and behavioural disorders due to multiple drug use and use of other psychoactive substances
	F25	Schizoaffective disorders
	F20	Schizophrenia
	F21	Schizotypal disorder
	F07	Personality and behavioural disorders due to brain disease, damage and dysfunction
	F06	Other mental disorders due to brain damage and dysfunction and to physical disease
	F33	Recurrent depressive disorder
	F51	Nonorganic sleep disorders
	F30	Manic episode
Sleep disorder	G47	Sleep disorders
	F51	Nonorganic sleep disorders
Migraine	G43	Migraine
Headache (non-migraine)	R51	Headache
	G44	Other headache syndromes
Allergic rhinitis	J30	Vasomotor and allergic rhinitis
Low back pain	M5416	Radiculopathy;Lumbar region
	M543	Sciatica
	M544	Lumbago with sciatica
	M5456	Low back pain;Lumbar region
	M5480	Other dorsalgia;Multiple sites in spine
	M5485	Other dorsalgia;Thoracolumbar region
	M5495	Dorsalgia, unspecified;Thoracolumbar region
Constipation	K590	Constipation
Collagen disease	M310	Hypersensitivity angiitis
	M311	Thrombotic microangiopathy
	M312	Lethal midline granuloma
	M313	Wegener granulomatosis
	M314	Aortic arch syndrome [Takayasu]
	M317	Microscopic polyangiitis
	M318	Other specified necrotizing vasculopathies
	M319	Necrotizing vasculopathy, unspecified
	M350	Sicca syndrome [Sjogren]
	M351	Other overlap syndromes
	M352	Behcet disease
	M353	Polymyalgia rheumatica
	M359	Systemic involvement of connective tissue, unspecified
	M300	Polyarteritis nodosa
	M301	Polyarteritis with lung involvement [Churg-Strauss]
	M303	Mucocutaneous lymph node syndrome [Kawasaki]
	M32	Systemic lupus erythematosus
	M34	Systemic sclerosis
	M33	Dermatopolymyositis
	M06	Other rheumatoid arthritis
	M05	Seropositive rheumatoid arthritis
	M082	Juvenile arthritis with systemic onset
Respiratory disease (including asthma)	J840	Alveolar and parietoalveolar conditions
	J841	Other interstitial pulmonary diseases with fibrosis
	J849	Interstitial pulmonary disease, unspecified
	J980	Diseases of bronchus, not elsewhere classified
	J981	Pulmonary collapse
	J984	Other disorders of lung
	J988	Other specified respiratory disorders
	J44	Other chronic obstructive pulmonary disease
	J47	Bronchiectasis
	J961	Chronic respiratory failure
	J64	Unspecified pneumoconiosis
	J42	Unspecified chronic bronchitis
	J990	Rheumatoid lung disease
	J991	Respiratory disorders in other diffuse connective tissue disorders
	J998	Respiratory disorders in other diseases classified elsewhere
	J43	Emphysema
	J45	Asthma
Conditions related to premenstrual syndrome	N943	Premenstrual tension syndrome
Female reproductive system–related disorders	N911	Secondary amenorrhoea
	N912	Amenorrhoea, unspecified
	N915	Oligomenorrhoea, unspecified
	N920	Excessive and frequent menstruation with regular cycle
	N921	Excessive and frequent menstruation with irregular cycle
	N923	Ovulation bleeding
	N924	Excessive bleeding in the premenopausal period
	N926	Irregular menstruation, unspecified
	N938	Other specified abnormal uterine and vaginal bleeding
	N939	Abnormal uterine and vaginal bleeding, unspecified
	N940	Mittelschmerz
	N948	Other specified conditions associated with female genital organs and menstrual cycle
	N970	Female infertility associated with anovulation
	N971	Female infertility of tubal origin
	N972	Female infertility of uterine origin
	N973	Female infertility of cervical origin
	N979	Female infertility, unspecified
	N850	Endometrial glandular hyperplasia
	N851	Endometrial adenomatous hyperplasia
	N852	Hypertrophy of uterus
	N853	Subinvolution of uterus
	N854	Malposition of uterus
	N856	Intrauterine synechiae
	N857	Haematometra
	N858	Other specified noninflammatory disorders of uterus
	N859	Noninflammatory disorder of uterus, unspecified
	C55	Malignant neoplasm of uterus, part unspecified
	N710	Acute inflammatory disease of uterus
	N719	Inflammatory disease of uterus, unspecified
	O001	Tubal pregnancy
	O008	Other ectopic pregnancy
	O009	Ectopic pregnancy, unspecified
	Q511	Doubling of uterus with doubling of cervix and vagina
	Q512	Other doubling of uterus
	Q513	Bicornate uterus
	Q519	Congenital malformation of uterus and cervix, unspecified
	N883	Incompetence of cervix uteri
	N888	Other specified noninflammatory disorders of cervix uteri
	N86	Erosion and ectropion of cervix uteri
	N870	Mild cervical dysplasia
	N871	Moderate cervical dysplasia
	N872	Severe cervical dysplasia, not elsewhere classified
	N879	Dysplasia of cervix uteri, unspecified
	N72	Inflammatory disease of cervix uteri
	D06	Carcinoma in situ of cervix uteri
	C53	Malignant neoplasm of cervix uteri
	C54	Malignant neoplasm of corpus uteri
	N800	Endometriosis of uterus
	N801	Endometriosis of ovary
	N802	Endometriosis of fallopian tube
	N803	Endometriosis of pelvic peritoneum
	N805	Endometriosis of intestine
	N809	Endometriosis, unspecified
	D250	Submucous leiomyoma of uterus
	D251	Intramural leiomyoma of uterus
	D252	Subserosal leiomyoma of uterus
	D259	Leiomyoma of uterus, unspecified
	N831	Corpus luteum cyst
	N832	Other and unspecified ovarian cysts
	N833	Acquired atrophy of ovary and fallopian tube
	N835	Torsion of ovary, ovarian pedicle and fallopian tube
	N836	Haematosalpinx
	N838	Other noninflammatory disorders of ovary, fallopian tube and broad ligament
	N839	Noninflammatory disorder of ovary, fallopian tube and broad ligament, unspecified
	O080	Genital tract and pelvic infection following abortion and ectopic and molar pregnancy
	N700	Acute salpingitis and oophoritis
	N701	Chronic salpingitis and oophoritis
	N709	Salpingitis and oophoritis, unspecified
	C56	Malignant neoplasm of ovary
	D27	Benign neoplasm of ovary
	E281	Ovarian dysfunction: Androgen excess
	E282	Polycystic ovarian syndrome
	E283	Primary ovarian failure
	E288	Other ovarian dysfunction
	E289	Ovarian dysfunction, unspecified
	N732	Unspecified parametritis and pelvic cellulitis
	N733	Female acute pelvic peritonitis
	N735	Female pelvic peritonitis, unspecified
	N736	Female pelvic peritoneal adhesions
	N739	Female pelvic inflammatory disease, unspecified
	C57	Malignant neoplasm of other and unspecified female genital organs
	D280	Benign neoplasm: Vulva
	D282	Benign neoplasm: Uterine tubes and ligaments
	N840	Polyp of corpus uteri
	N841	Polyp of cervix uteri
	N842	Polyp of vagina
	N811	Cystocele
	N812	Incomplete uterovaginal prolapse
	N814	Uterovaginal prolapse, unspecified
	N816	Rectocele
	N819	Female genital prolapse, unspecified
	D390	Neoplasm of uncertain or unknown behaviour: Uterus
	D391	Neoplasm of uncertain or unknown behaviour: Ovary
	D392	Neoplasm of uncertain or unknown behaviour: Placenta
	D397	Neoplasm of uncertain or unknown behaviour: Other female genital organs
