# Supplementary material
Source: Research Square preprint supplement (doi:10.21203/rs.3.rs-8587407/v1)
Supplement: Supplementary file 7 [file b98a4eb789579db09adabb5f.docx]

Supplementary Material 8. A Breakdown of Absenteeism: By Status (>0 vs. 0)

|  |  | number of subject | | rate | |  |  |
| --- | --- | --- | --- | --- | --- | --- | --- |
|  | n | absenteeism>0 | absenteeism=0 | absenteeism>0 | absenteeism=0 | p | * |
| Individuals without medical records | 200 | 12 | 188 | 6.0% | 94.0% | - |  |
| LNG-IUS | 29 | 3 | 26 | 10.3% | 89.7% | 0.414 |  |
| LEP alone | 239 | 19 | 220 | 7.9% | 92.1% | 0.460 |  |
| No intervention | 197 | 21 | 176 | 10.7% | 89.3% | 0.104 |  |
| Progestin alone | 81 | 10 | 71 | 12.3% | 87.7% | 0.087 |  |
| Analgesic agents alone | 111 | 17 | 94 | 15.3% | 84.7% | 0.013 | * |
| Kampo Medicine alone | 52 | 8 | 44 | 15.4% | 84.6% | 0.040 | * |

*p<0.05, Fisher’s exact test vs Individuals without medical records. Kampo medicine: Chinese traditional herbal medicine adopted to and evolved in Japan; LEP: low-dose estrogen–progestin; LNG-IUS: levonorgestrel intrauterine system.
