# Supplementary material
Source: Research Square preprint supplement (doi:10.21203/rs.3.rs-8587407/v1)
Supplement: Supplementary file 8 [file c6c4a555d6344d7966fa6120.docx]

Supplementary Material 6-a. WPAI Absenteeism (detailed by the presence or absence of each condition)

|  | With condition |  | Without condition |  |  |  |
| --- | --- | --- | --- | --- | --- | --- |
|  | n | Mean ± SE | n | Mean ± SE | p |  |
| Sleep disorder | 543 | 6.0 ± 0.8 | 7,005 | 2.1 ± 0.1 | <0.001 | ** |
| Malignant tumor | 228 | 4.8 ± 1.2 | 7,320 | 2.3 ± 0.1 | 0.001 | * |
| Cardiovascular disease | 514 | 4.7 ± 0.7 | 7,034 | 2.3 ± 0.1 | <0.001 | ** |
| Headache (non-migraine) | 874 | 4.4 ± 0.5 | 6,674 | 2.2 ± 0.1 | <0.001 | ** |
| Mental disorders (including depression and schizophrenia) | 1,312 | 4.4 ± 0.4 | 6,236 | 2.0 ± 0.1 | <0.001 | ** |
| Thyroid disorder | 599 | 4.3 ± 0.6 | 6,949 | 2.3 ± 0.1 | <0.001 | ** |
| Constipation | 905 | 4.2 ± 0.5 | 6,643 | 2.2 ± 0.1 | <0.001 | ** |
| Diabetes mellitus | 105 | 4.1 ± 1.6 | 7,443 | 2.4 ± 0.1 | 0.110 |  |
| Respiratory disease (including asthma) | 899 | 3.9 ± 0.5 | 6,649 | 2.2 ± 0.1 | <0.001 | ** |
| Migraine | 320 | 3.4 ± 0.7 | 7,228 | 2.4 ± 0.1 | 0.121 |  |
| Low back pain | 908 | 3.1 ± 0.4 | 6,640 | 2.3 ± 0.1 | 0.060 |  |
| Collagen disease | 139 | 3.0 ± 1.0 | 7,409 | 2.4 ± 0.1 | 0.563 |  |
| Allergic rhinitis | 2,651 | 2.9 ± 0.2 | 4,897 | 2.2 ± 0.2 | 0.005 | * |
| Dysmenorrhea | 805 | 2.5 ± 0.3 | 6,743 | 2.4 ± 0.1 | 0.861 |  |
| Conditions related to premenstrual syndrome | 63 | 1.8 ± 0.9 | 7,485 | 2.4 ± 0.1 | 0.681 |  |
| With medical records | 7,348 | 2.5 ± 0.1 |  |  |  |  |
| No medical records | 200 | 1.2 ± 0.5 |  |  |  |  |

SE: standard error.

*p<0.05, **p<0.001, the Student’s *t*-test.

Supplementary Material 6-b. WPAI Presenteeism (detailed by the presence or absence of each condition)

|  | With condition |  | Without condition |  |  |  |
| --- | --- | --- | --- | --- | --- | --- |
|  | n | Mean ± SE | n | Mean ± SE | p |  |
| Conditions related to premenstrual syndrome | 64 | 33.1 ± 3.6 | 7,493 | 21.7 ± 0.3 | <0.001 | ** |
| Sleep disorder | 529 | 31.0 ± 1.2 | 7,028 | 21.1 ± 0.3 | <0.001 | ** |
| Migraine | 318 | 30.1 ± 1.5 | 7,239 | 21.4 ± 0.3 | <0.001 | ** |
| Mental disorders (including depression and schizophrenia) | 1,301 | 27.4 ± 0.7 | 6,256 | 20.6 ± 0.3 | <0.001 | ** |
| Headache (non-migraine) | 875 | 27.4 ± 0.9 | 6,682 | 21.0 ± 0.3 | <0.001 | ** |
| Dysmenorrhea | 803 | 26.8 ± 0.9 | 6,754 | 21.2 ± 0.3 | <0.001 | ** |
| Low back pain | 911 | 25.9 ± 0.9 | 6,646 | 21.2 ± 0.3 | <0.001 | ** |
| Respiratory disease (including asthma) | 891 | 24.8 ± 0.9 | 6,666 | 21.4 ± 0.3 | <0.001 | ** |
| Constipation | 904 | 24.5 ± 0.9 | 6,653 | 21.4 ± 0.3 | <0.001 | ** |
| Diabetes mellitus | 105 | 24.4 ± 2.4 | 7,452 | 21.7 ± 0.3 | 0.276 |  |
| Cardiovascular disease | 510 | 24.0 ± 1.1 | 7,047 | 21.6 ± 0.3 | 0.035 | * |
| Thyroid disorder | 597 | 23.9 ± 1.1 | 6,960 | 21.6 ± 0.3 | 0.026 | * |
| Allergic rhinitis | 2,649 | 23.9 ± 0.5 | 4,908 | 20.6 ± 0.3 | <0.001 | ** |
| Malignant tumor | 223 | 22.6 ± 1.7 | 7,334 | 21.7 ± 0.3 | 0.609 |  |
| Collagen disease | 202 | 21.5 ± 1.7 | 7,418 | 21.8 ± 0.3 | 0.903 |  |
| With medical records | 7,355 | 21.8 ± 0.3 |  |  |  |  |
| No medical records | 202 | 19.6 ± 1.6 |  |  |  |  |

SE: standard error.

*p<0.05, **p<0.001, the Student’s *t*-test.

Supplementary Material 6-c. WPAI Percent overall work impairment due to health (detailed by the presence or absence of each condition)

|  | With condition |  | Without condition |  |  |  |
| --- | --- | --- | --- | --- | --- | --- |
|  | n | Mean ± SE | n | Mean ± SE | p |  |
| Conditions related to premenstrual syndrome | 63 | 34.9 ± 3.6 | 7,436 | 22.8 ± 0.3 | <0.001 | ** |
| Sleep disorder | 525 | 32.6 ± 1.2 | 6,974 | 22.1 ± 0.3 | <0.001 | ** |
| Migraine | 317 | 31.5 ± 1.6 | 7,182 | 22.5 ± 0.3 | <0.001 | ** |
| Headache (non-migraine) | 859 | 29.1 ± 1.0 | 6,640 | 22.1 ± 0.3 | <0.001 | ** |
| Mental disorders (including depression and schizophrenia) | 1,285 | 28.8 ± 0.8 | 6,214 | 21.6 ± 0.3 | <0.001 | ** |
| Dysmenorrhea | 802 | 28.0 ± 1.0 | 6,697 | 22.3 ± 0.3 | <0.001 | ** |
| Low back pain | 902 | 27.4 ± 0.9 | 6,597 | 22.2 ± 0.3 | <0.001 | ** |
| Respiratory disease (including asthma) | 886 | 26.2 ± 0.9 | 6,613 | 22.4 ± 0.3 | <0.001 | ** |
| Constipation | 889 | 25.8 ± 0.9 | 6,610 | 22.5 ± 0.3 | <0.001 | ** |
| Thyroid disorder | 591 | 25.7 ± 1.1 | 6,908 | 22.6 ± 0.3 | 0.005 | * |
| Diabetes mellitus | 103 | 25.5 ± 2.5 | 7,396 | 22.8 ± 0.3 | 0.282 |  |
| Cardiovascular disease | 504 | 25.5 ± 1.2 | 6,995 | 22.7 ± 0.3 | 0.015 | * |
| Allergic rhinitis | 2,632 | 25.2 ± 0.5 | 4,867 | 21.6 ± 0.4 | <0.001 | ** |
| Malignant tumor | 221 | 23.7 ± 1.7 | 7,278 | 22.8 ± 0.3 | 0.613 |  |
| Collagen disease | 138 | 22.7 ± 2.2 | 7,361 | 22.9 ± 0.3 | 0.933 |  |
| With medical records | 7,299 | 22.9 ± 0.3 |  |  |  |  |
| No medical records | 200 | 20.5 ± 1.6 |  |  |  |  |

SE: standard error.

*p<0.05, **p<0.001, the Student’s *t*-test.

Supplementary Material 6-d. WPAI Percent activity impairment due to health (detailed by the presence or absence of each condition)

|  | With condition |  | Without condition |  |  |  |
| --- | --- | --- | --- | --- | --- | --- |
|  | n | Mean ± SE | n | Mean ± SE | p |  |
| Conditions related to premenstrual syndrome | 80 | 33.5 ± 3.3 | 9,155 | 23.0 ± 0.3 | <0.001 | ** |
| Sleep disorder | 692 | 33.1 ± 1.1 | 8,543 | 22.3 ± 0.3 | <0.001 | ** |
| Migraine | 402 | 30.8 ± 1.4 | 8,833 | 22.8 ± 0.3 | <0.001 | ** |
| Headache (non-migraine) | 1,149 | 29.7 ± 0.8 | 8,086 | 22.2 ± 0.3 | <0.001 | ** |
| Mental disorders (including depression and schizophrenia) | 1,659 | 29.1 ± 0.7 | 7,576 | 21.8 ± 0.3 | <0.001 | ** |
| Low back pain | 1,175 | 27.8 ± 0.8 | 8,060 | 22.5 ± 0.3 | <0.001 | ** |
| Dysmenorrhea | 956 | 27.5 ± 0.9 | 8,279 | 22.6 ± 0.3 | <0.001 | ** |
| Constipation | 1,279 | 27.3 ± 0.8 | 7,956 | 22.5 ± 0.3 | <0.001 | ** |
| Respiratory disease (including asthma) | 1,119 | 27.0 ± 0.8 | 8,116 | 22.6 ± 0.3 | <0.001 | ** |
| Collagen disease | 172 | 26.8 ± 2.2 | 9,063 | 23.1 ± 0.3 | 0.059 |  |
| Diabetes mellitus | 135 | 25.9 ± 2.2 | 9,100 | 23.1 ± 0.3 | 0.204 |  |
| Thyroid disorder | 747 | 25.9 ± 1 | 8,488 | 22.9 ± 0.3 | 0.002 | * |
| Malignant tumor | 287 | 25.8 ± 1.7 | 8,948 | 23.0 ± 0.3 | 0.076 |  |
| Allergic rhinitis | 3,332 | 25.2 ± 0.5 | 5,903 | 22.0 ± 0.3 | <0.001 | ** |
| Cardiovascular disease | 639 | 24.9 ± 1.1 | 8,596 | 23.0 ± 0.3 | 0.072 |  |
| With medical records | 8,990 | 23.2 ± 0.3 |  |  |  |  |
| No medical records | 245 | 21.0 ± 1.5 |  |  |  |  |

SE: standard error.

*p<0.05, **p<0.001, the Student’s *t*-test.
